# Supplementary material
Source: MDPI journal article supplement (https://www.mdpi.com/2504-2289/7/2/115)
Supplement: s1 [file s1]

Table S1: Dataset

| S.No. | Dye  | Structure                                                                                                                                                                                                                                                                                                                                                                                                                                                                                                                                                                                                                                                                                                                                                                                                                                                                                                  | Formula                                                       | $\lambda_{\text{max}}$<br>(MLCT) | Solvent | C-C<br>Single<br>Bond | C=C<br>double<br>bond | C-N<br>bond | Metal-N<br>bond | C=O<br>bond | Metal-NCS<br>bond | C-O bond | Other bonds/<br>groups    | References |
|-------|------|------------------------------------------------------------------------------------------------------------------------------------------------------------------------------------------------------------------------------------------------------------------------------------------------------------------------------------------------------------------------------------------------------------------------------------------------------------------------------------------------------------------------------------------------------------------------------------------------------------------------------------------------------------------------------------------------------------------------------------------------------------------------------------------------------------------------------------------------------------------------------------------------------------|---------------------------------------------------------------|----------------------------------|---------|-----------------------|-----------------------|-------------|-----------------|-------------|-------------------|----------|---------------------------|------------|
| 1.    | N749 | 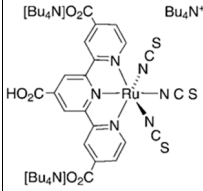                                                                                                                                                                                                                                                                                                                                                                                                                                                                                                                                                                                                                                                                                                                                                                                                                          | $\text{C}_{69}\text{H}_{116}\text{N}_9\text{O}_6\text{RuS}_3$ | 600                              | DMF     | 11                    | 6                     | 6           | 3               | 3           | 3                 | 3        | $\text{N}^+\text{Bu}_4=2$ | [1]        |
| 2.    | N719 |  <p><b>N719:</b> <math>\text{R} = \text{CO}_2\text{N}(\text{n-Bu})_4</math></p>                                                                                                                                                                                                                                                                                                                                                                                                                                                                                                                                                                                                                                                                                                                                           | $\text{C}_{58}\text{H}_{86}\text{N}_8\text{O}_8\text{RuS}_2$  | 525                              | DMF     | 13                    | 8                     | 8           | 4               | 4           | 2                 | 4        | $\text{N}^+\text{Bu}_4=2$ | [2-4]      |
| 3.    | Z907 |                                                                                                                                                                                                                                                                                                                                                                                                                                                                                                                                                                                                                                                                                                                                                                                                                          | $\text{C}_{42}\text{H}_{52}\text{N}_6\text{O}_4\text{RuS}_2$  | 520                              | DMF     | 30                    | 8                     | 8           | 4               | 2           | 2                 | 2        | O-H=1<br>O-Na=1           | [5, 6]     |
| 4.    | YS-1 |  <p> <b>YS-1:</b> <math>\text{X} = \text{C}(\text{C}_2\text{H}_5)_2</math>; <math>\text{Y} = \text{CH}=\text{CH}</math>; <math>\text{R}^1 = \text{H}</math><br/> <b>YS-2:</b> <math>\text{X} = \text{C}(\text{C}_6\text{H}_{13})_2</math>; <math>\text{Y} = \text{CH}=\text{CH}</math>; <math>\text{R}^1 = \text{H}</math><br/> <b>YS-3:</b> <math>\text{X} = \text{C}(\text{C}_6\text{H}_{13})_2</math>; <math>\text{Y} = \text{CH}=\text{CH}</math>; <math>\text{R}^1 = 2\text{-hexylthio}</math><br/> <b>YS-4:</b> <math>\text{X} = \text{N}(\text{C}_6\text{H}_{13})</math>; <math>\text{Y} = \text{CH}=\text{CH}</math>; <math>\text{R}^1 = \text{H}</math><br/> <b>YS-5:</b> <math>\text{X} = \text{N}(\text{C}_6\text{H}_{13})</math>; <math>\text{Y} = \text{S}</math>; <math>\text{R}^1 = \text{H}</math> </p> | $\text{C}_{58}\text{H}_{48}\text{N}_6\text{O}_4\text{RuS}_2$  | 536                              | DMF     | 40                    | 16                    | 8           | 4               | 2           | 2                 | 2        | O-H=2                     | [6]        |

|    |      |                                                                                                                                                                                                                                                                                                                                                                                                                                                                                                                                                                             |                                                                                |     |     |    |    |    |   |   |   |   |                |     |
|----|------|-----------------------------------------------------------------------------------------------------------------------------------------------------------------------------------------------------------------------------------------------------------------------------------------------------------------------------------------------------------------------------------------------------------------------------------------------------------------------------------------------------------------------------------------------------------------------------|--------------------------------------------------------------------------------|-----|-----|----|----|----|---|---|---|---|----------------|-----|
| 5. | YS-2 | 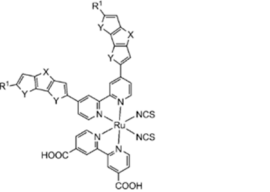 <p> <b>YS-1:</b> X = C(C<sub>2</sub>H<sub>5</sub>)<sub>2</sub>; Y = CH=CH; R<sup>1</sup> = H<br/> <b>YS-2:</b> X = C(C<sub>6</sub>H<sub>13</sub>)<sub>2</sub>; Y = CH=CH; R<sup>1</sup> = H<br/> <b>YS-3:</b> X = C(C<sub>6</sub>H<sub>13</sub>)<sub>2</sub>; Y = CH=CH; R<sup>1</sup> = 2-hexylthiophene<br/> <b>YS-4:</b> X = N(C<sub>6</sub>H<sub>13</sub>); Y = CH=CH; R<sup>1</sup> = H<br/> <b>YS-5:</b> X = N(C<sub>6</sub>H<sub>13</sub>); Y = S; R<sup>1</sup> = H         </p>  | C <sub>74</sub> H <sub>80</sub> N <sub>6</sub> O <sub>4</sub> RuS <sub>2</sub> | 536 | DMF | 56 | 16 | 8  | 4 | 2 | 2 | 2 | O-H=2          | [6] |
| 6. | YS-3 |  <p> <b>YS-1:</b> X = C(C<sub>2</sub>H<sub>5</sub>)<sub>2</sub>; Y = CH=CH; R<sup>1</sup> = H<br/> <b>YS-2:</b> X = C(C<sub>6</sub>H<sub>13</sub>)<sub>2</sub>; Y = CH=CH; R<sup>1</sup> = H<br/> <b>YS-3:</b> X = C(C<sub>6</sub>H<sub>13</sub>)<sub>2</sub>; Y = CH=CH; R<sup>1</sup> = 2-hexylthiophene<br/> <b>YS-4:</b> X = N(C<sub>6</sub>H<sub>13</sub>); Y = CH=CH; R<sup>1</sup> = H<br/> <b>YS-5:</b> X = N(C<sub>6</sub>H<sub>13</sub>); Y = S; R<sup>1</sup> = H         </p>  | C <sub>84</sub> H <sub>94</sub> N <sub>6</sub> O <sub>4</sub> RuS <sub>3</sub> | 539 | DMF | 72 | 20 | 8  | 4 | 2 | 2 | 2 | O-H=2<br>C-S=4 | [6] |
| 7. | YS-4 |  <p> <b>YS-1:</b> X = C(C<sub>2</sub>H<sub>5</sub>)<sub>2</sub>; Y = CH=CH; R<sup>1</sup> = H<br/> <b>YS-2:</b> X = C(C<sub>6</sub>H<sub>13</sub>)<sub>2</sub>; Y = CH=CH; R<sup>1</sup> = H<br/> <b>YS-3:</b> X = C(C<sub>6</sub>H<sub>13</sub>)<sub>2</sub>; Y = CH=CH; R<sup>1</sup> = 2-hexylthiophene<br/> <b>YS-4:</b> X = N(C<sub>6</sub>H<sub>13</sub>); Y = CH=CH; R<sup>1</sup> = H<br/> <b>YS-5:</b> X = N(C<sub>6</sub>H<sub>13</sub>); Y = S; R<sup>1</sup> = H         </p> | C <sub>60</sub> H <sub>54</sub> N <sub>8</sub> O <sub>4</sub> RuS <sub>2</sub> | 535 | DMF | 38 | 16 | 14 | 4 | 2 | 2 | 2 | O-H=2          | [6] |

|     |        |                                                                                                                                                                                                                                                                                                                                                                                                                                                                                                                                                      |                                                                                |     |     |    |    |    |   |   |   |    |                          |     |
|-----|--------|------------------------------------------------------------------------------------------------------------------------------------------------------------------------------------------------------------------------------------------------------------------------------------------------------------------------------------------------------------------------------------------------------------------------------------------------------------------------------------------------------------------------------------------------------|--------------------------------------------------------------------------------|-----|-----|----|----|----|---|---|---|----|--------------------------|-----|
| 8.  | YS-5   | 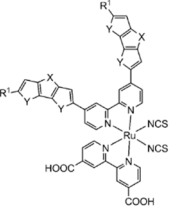 <p>YS-1: X = C(C<sub>6</sub>H<sub>5</sub>)<sub>2</sub>; Y = CH=CH; R<sup>1</sup> = H<br/> YS-2: X = C(C<sub>6</sub>H<sub>13</sub>)<sub>2</sub>; Y = CH=CH; R<sup>1</sup> = H<br/> YS-3: X = C(C<sub>6</sub>H<sub>13</sub>)<sub>2</sub>; Y = CH=CH; R<sup>1</sup> = 2-hexylthiophen<br/> YS-4: X = N(C<sub>6</sub>H<sub>13</sub>)<sub>2</sub>; Y = CH=CH; R<sup>1</sup> = H<br/> YS-5: X = N(C<sub>6</sub>H<sub>13</sub>)<sub>2</sub>; Y = S; R<sup>1</sup> = H</p> | C <sub>52</sub> H <sub>46</sub> N <sub>6</sub> O <sub>4</sub> RuS <sub>6</sub> | 555 | DMF | 30 | 16 | 14 | 4 | 2 | 2 | 2  | O-H=2                    | [6] |
| 9.  | CYC-B1 |                                                                                                                                                                                                                                                                                                                                                                                                                                                                     | C <sub>56</sub> H <sub>56</sub> N <sub>6</sub> O <sub>4</sub> RuS <sub>6</sub> | 553 | DMF | 36 | 16 | 8  | 4 | 2 | 2 | 2  | O-H=2<br>C-S=8           | [7] |
| 10. | CYC-B3 |  <p>SW-E1: X = A<br/> CYC-B3: X = B</p>                                                                                                                                                                                                                                                                                                                                                                                                                             | C <sub>48</sub> H <sub>52</sub> N <sub>6</sub> O <sub>4</sub> RuS <sub>4</sub> | 544 | DMF | 32 | 12 | 8  | 4 | 2 | 2 | 2  | O-H=2<br>C-S=4           | [8] |
| 11. | SJW-E1 |  <p>SW-E1: X = A<br/> CYC-B3: X = B</p>                                                                                                                                                                                                                                                                                                                                                                                                                            | C <sub>52</sub> H <sub>60</sub> N <sub>6</sub> O <sub>8</sub> RuS <sub>4</sub> | 546 | DMF | 34 | 12 | 8  | 4 | 2 | 2 | 10 | O-H=2<br>C-S=4           | [8] |
| 12. | C101   |                                                                                                                                                                                                                                                                                                                                                                                                                                                                   | C <sub>44</sub> H <sub>44</sub> N <sub>6</sub> O <sub>4</sub> RuS <sub>4</sub> | 547 | DMF | 28 | 12 | 8  | 4 | 2 | 2 | 2  | O-H=1<br>O-Na=1<br>C-S=4 | [9] |

|     |      |                                                                                                                                                                                                                   |                                 |     |     |    |    |   |   |   |   |    |                           |      |
|-----|------|-------------------------------------------------------------------------------------------------------------------------------------------------------------------------------------------------------------------|---------------------------------|-----|-----|----|----|---|---|---|---|----|---------------------------|------|
| 13. | C102 | 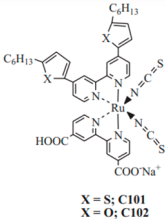 <p>X = S; C101<br/>X = O; C102</p>                                                                                               | $C_{44}H_{44}N_6O_6RuS_2$       | 547 | DMF | 28 | 12 | 8 | 4 | 2 | 2 | 6  | O-H=1<br>O-Na=1           | [10] |
| 14. | C103 |  <p>S1W-E1: X = H<sup>+</sup>; R = C<sub>6</sub>H<sub>17</sub><br/>C103: X = Na<sup>+</sup>; R = C<sub>6</sub>H<sub>13</sub></p> | $C_{50}H_{52}N_7O_8RuS_4N$<br>a | 550 | DMF | 30 | 12 | 8 | 4 | 2 | 2 | 10 | O-H=1<br>O-Na=1<br>C-S=4  | [11] |
| 15. | C104 |  <p>C104</p>                                                                                                                     | $C_{52}H_{50}N_6O_4RuS_6$       | 553 | DMF | 34 | 14 | 8 | 4 | 2 | 2 | 2  | O-H=2<br>C-S=8            | [12] |
| 16. | C105 |  <p>e<sub>2</sub></p>                                                                                                           | $C_{44}H_{43}N_6O_4RuS_2S$      | 550 | DMF | 28 | 12 | 8 | 4 | 2 | 2 | 2  | O-H=1<br>O-Na=1<br>C-Se=4 | [13] |
| 17. | C106 |  <p>C106</p>                                                                                                                   | $C_{44}H_{44}N_6O_4RuS_6$       | 550 | DMF | 26 | 12 | 8 | 4 | 2 | 2 | 2  | O-H=1<br>O-Na=1<br>C-S=8  | [9]  |

|     |         |                                                                                     |                                                 |     |     |    |    |   |   |   |   |    |                          |      |
|-----|---------|-------------------------------------------------------------------------------------|-------------------------------------------------|-----|-----|----|----|---|---|---|---|----|--------------------------|------|
| 18. | C107    | 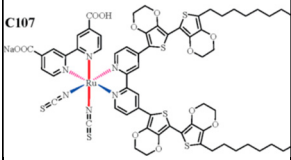   | $C_{64}H_{61}N_6O_{12}RuS_6Na$                  | 559 | DMF | 40 | 16 | 8 | 4 | 2 | 2 | 18 | O-H=1<br>O-Na=1<br>C-S=8 | [11] |
| 19. | K19     |    | $C_{52}H_{52}N_6O_6RuS_2$<br><br>Benzene Ring-2 | 545 | DMF | 32 | 16 | 8 | 4 | 2 | 2 | 6  | O-H=2                    | [14] |
| 20. | K77     |    | $C_{48}H_{44}N_6O_6RuS_2$<br><br>Benzene Ring-2 | 546 | DMF | 28 | 16 | 8 | 4 | 2 | 2 | 6  | O-H=2                    | [15] |
| 21. | CYC-B11 |  | $C_{52}H_{48}N_6O_4RuS_8$                       | 554 | DMF | 30 | 16 | 8 | 4 | 2 | 2 | 2  | O-H=2<br>C-S=12          | [16] |

|     |         |                                                                                                                                                                                  |                                                                                 |     |     |    |    |    |   |   |   |    |                                                                                   |      |
|-----|---------|----------------------------------------------------------------------------------------------------------------------------------------------------------------------------------|---------------------------------------------------------------------------------|-----|-----|----|----|----|---|---|---|----|-----------------------------------------------------------------------------------|------|
| 22. | CYC-B6L | 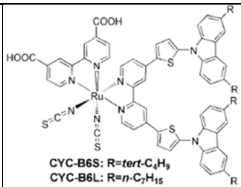 <p>CYC-B6S: R=tert-C<sub>4</sub>H<sub>9</sub><br/>CYC-B6L: R=n-C<sub>7</sub>H<sub>15</sub></p>  | C <sub>84</sub> H <sub>90</sub> N <sub>8</sub> O <sub>4</sub> RuS <sub>4</sub>  | 551 | DMF | 38 | 24 | 14 | 4 | 2 | 2 | 2  | O-H=2<br>C-S=4                                                                    | [17] |
| 23. | CYC-B6S |  <p>CYC-B6S: R=tert-C<sub>4</sub>H<sub>9</sub><br/>CYC-B6L: R=n-C<sub>7</sub>H<sub>15</sub></p> | C <sub>72</sub> H <sub>66</sub> N <sub>8</sub> O <sub>4</sub> RuS <sub>4</sub>  | 548 | DMF | 46 | 24 | 14 | 4 | 2 | 2 | 2  | O-H=2<br>C-S=4                                                                    | [17] |
| 24. | CYC-B7  |  <p>C<sub>7</sub>H<sub>15</sub></p>                                                             | C <sub>92</sub> H <sub>94</sub> N <sub>8</sub> O <sub>4</sub> RuS <sub>6</sub>  | 551 | DMF | 62 | 28 | 14 | 4 | 2 | 2 | 2  | O-H=2<br>C-S=8                                                                    | [18] |
| 25. | CYC-B13 |  <p>N<sup>+</sup>(C<sub>4</sub>H<sub>9</sub>)<sub>4</sub></p>                                  | C <sub>92</sub> H <sub>105</sub> N <sub>9</sub> O <sub>8</sub> RuS <sub>4</sub> | 547 | DMF | 46 | 24 | 12 | 4 | 2 | 2 | 10 | C-S=4<br>O-H=1<br>N <sup>+</sup> (C <sub>4</sub> H <sub>9</sub> ) <sub>4</sub> =1 | [19] |

|     |       |                                                                                                  |                             |     |     |    |    |    |   |   |   |   |                 |      |
|-----|-------|--------------------------------------------------------------------------------------------------|-----------------------------|-----|-----|----|----|----|---|---|---|---|-----------------|------|
| 26. | JK-55 | 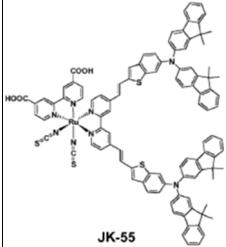 <p>JK-55</p>    | $C_{104}H_{78}N_8O_4RuS_4$  | 539 | DMF | 68 | 42 | 14 | 4 | 2 | 2 | 2 | O-H=2<br>C-S=4  | [20] |
| 27. | JK-56 |  <p>JK-56</p>   | $C_{67}H_{49}N_7O_4RuS_3$   | 537 | DMF | 41 | 25 | 11 | 4 | 2 | 2 | 2 | O-H=2<br>C-S=2  | [20] |
| 28. | RC-31 |  <p>RC-31</p>   | $C_{48}H_{45}N_8O_4RuS_2Na$ | 560 | DMF | 26 | 16 | 14 | 4 | 2 | 2 | 2 | O-H=1<br>O-Na=1 | [21] |
| 29. | RC-32 |  <p>RC-32</p> | $C_{52}H_{45}N_8O_4RuS_2Na$ | 564 | DMF | 34 | 16 | 14 | 4 | 2 | 2 | 2 | O-H=1<br>O-Na=1 | [21] |

|     |       |                                                                                                                                                                                                                                                 |                                                   |     |     |    |    |    |   |   |   |   |                 |      |
|-----|-------|-------------------------------------------------------------------------------------------------------------------------------------------------------------------------------------------------------------------------------------------------|---------------------------------------------------|-----|-----|----|----|----|---|---|---|---|-----------------|------|
| 30. | RC-36 |                                                                                                                                                                 | $C_{68}H_{45}N_8O_5RuS_2Na$<br><br>Benzene Ring-6 | 547 | DMF | 38 | 28 | 14 | 4 | 2 | 2 | 2 | O-H=1<br>O-Na=1 | [21] |
| 31. | PRT1  |  <p> <b>PRT1</b> : R = H<br/> <b>PRT2</b> : R = OMe<br/> <b>PRT3</b> : R = OC<sub>8</sub>H<sub>17</sub><br/> <b>PRT4</b> : R = Bu<sup>t</sup> </p> <p>(e)</p>  | $C_{36}H_{23}N_7O_6RuF_3S$<br><br>Benzene Ring-1  | 520 | DMF | 21 | 13 | 10 | 5 | 3 | 1 | 3 | O-H=3<br>C-F=3  | [22] |
| 32. | PRT2  |  <p> <b>PRT1</b> : R = H<br/> <b>PRT2</b> : R = OMe<br/> <b>PRT3</b> : R = OC<sub>8</sub>H<sub>17</sub><br/> <b>PRT4</b> : R = Bu<sup>t</sup> </p> <p>(e)</p> | $C_{37}H_{25}N_7O_7RuF_6S$<br><br>Benzene Ring-1  | 517 | DMF | 21 | 13 | 10 | 5 | 3 | 1 | 5 | O-H=3<br>C-F=3  | [22] |



|     |       |                                                                                                                                                                                                                                                                                              |                                                                                               |     |     |    |    |    |   |   |   |   |                                  |      |
|-----|-------|----------------------------------------------------------------------------------------------------------------------------------------------------------------------------------------------------------------------------------------------------------------------------------------------|-----------------------------------------------------------------------------------------------|-----|-----|----|----|----|---|---|---|---|----------------------------------|------|
| 33. | PRT3  | 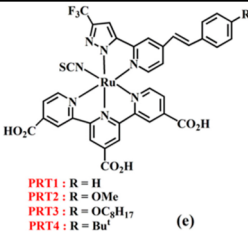 <p>PRT1 : R = H<br/>PRT2 : R = OMe<br/>PRT3 : R = OC<sub>8</sub>H<sub>17</sub><br/>PRT4 : R = Bu<sup>t</sup></p> <p>(e)</p>                                                                                 | C <sub>44</sub> H <sub>38</sub> N <sub>7</sub> O <sub>7</sub> RuF <sub>3</sub> S              | 519 | DMF | 28 | 13 | 10 | 5 | 3 | 1 | 5 | O-H=3<br>C-F=3                   | [22] |
| 34. | PRT4  |  <p>PRT1 : R = H<br/>PRT2 : R = OMe<br/>PRT3 : R = OC<sub>8</sub>H<sub>17</sub><br/>PRT4 : R = Bu<sup>t</sup></p> <p>(e)</p>                                                                                | C <sub>40</sub> H <sub>30</sub> N <sub>7</sub> O <sub>6</sub> RuF <sub>3</sub> S              | 519 | DMF | 25 | 13 | 10 | 5 | 3 | 1 | 3 | O-H=3<br>C-F=3                   | [22] |
| 35. | PRT21 |  <p>PRT21: R = </p>                                                                                                        | C <sub>46</sub> H <sub>38</sub> N <sub>7</sub> O <sub>6</sub> RuF <sub>3</sub> S <sub>2</sub> | 514 | DMF | 24 | 11 | 10 | 5 | 3 | 1 | 3 | O-H=3<br>C-F=3<br>N-N=1<br>C-S=2 | [23] |
| 36. | PRT22 |  <p>PRT21: R = <br/>PRT22: R = </p> | C <sub>46</sub> H <sub>38</sub> N <sub>7</sub> O <sub>6</sub> RuF <sub>3</sub> S <sub>3</sub> | 520 | DMF | 23 | 11 | 10 | 5 | 3 | 1 | 3 | O-H=3<br>C-F=3<br>N-N=1<br>C-S=4 | [23] |

|     |       |                              |                              |     |     |    |    |    |   |   |   |   |                         |      |
|-----|-------|------------------------------|------------------------------|-----|-----|----|----|----|---|---|---|---|-------------------------|------|
| 37. | PRT23 | <br>PRT23: R =               | $C_{41}H_{39}N_7O_4RuF_3S_2$ | 536 | DMF | 27 | 11 | 10 | 5 | 2 | 1 | 2 | O-H=2<br>C-F=3<br>C-S=2 | [23] |
| 38. | PRT24 | <br>PRT23: R =<br>PRT24: R = | $C_{41}H_{39}N_7O_4RuF_3S_3$ | 537 | DMF | 26 | 11 | 10 | 5 | 2 | 1 | 2 | O-H=2<br>C-F=3<br>C-S=4 | [23] |
| 39. | TF1   | <br>TF1: R = H<br>TF2: R =   | $C_{31}H_{16}N_8O_6Ru$       | 510 | DMF | 19 | 10 | 12 | 6 | 3 | 0 | 3 | O-H=3<br>C-F=6          | [24] |
| 40. | TF2   | <br>TF1: R = H<br>TF2: R =   | $C_{41}H_{41}N_8O_6RuF_6S$   | 509 | DMF | 27 | 12 | 12 | 6 | 3 | 0 | 3 | O-H=3<br>C-F=6<br>C-S=2 | [24] |

|     |      |                                                                                                                                                                                                                                                                                                                                                                                                                                                                                                                                  |                            |     |     |    |    |    |   |   |   |   |                                       |      |
|-----|------|----------------------------------------------------------------------------------------------------------------------------------------------------------------------------------------------------------------------------------------------------------------------------------------------------------------------------------------------------------------------------------------------------------------------------------------------------------------------------------------------------------------------------------|----------------------------|-----|-----|----|----|----|---|---|---|---|---------------------------------------|------|
| 41. | TF3  | 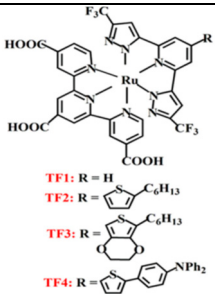 <p> <b>TF1:</b> R = H<br/> <b>TF2:</b> R = <br/> <b>TF3:</b> R = <br/> <b>TF4:</b> R =  </p>                                                                                                 | $C_{43}H_{43}N_8O_8RuF_6S$ | 513 | DMF | 28 | 12 | 12 | 6 | 3 | 0 | 7 | O-H=7<br>C-S=2<br>C-F=6               | [24] |
| 42. | TF4  |  <p> <b>TF1:</b> R = H<br/> <b>TF2:</b> R = <br/> <b>TF3:</b> R = <br/> <b>TF4:</b> R =  </p>                                                                                                | $C_{53}H_{32}O_6N_9RuF_6S$ | 516 | DMF | 30 | 21 | 15 | 6 | 3 | 0 | 3 | O-H=3<br>C-S=2<br>N-N=2               | [24] |
| 43. | MJ-4 |  <p> <b>MJ-4:</b> R = <br/> <b>MJ-6:</b> R = <br/> <b>MJ-7:</b> R = <br/> <b>MJ-12:</b> R =  </p>      | $C_{49}H_{67}N_7O_4RuS_3$  | 594 | DMF | 20 | 9  | 6  | 3 | 2 | 3 | 2 | O-H=2<br>TBA <sup>+</sup> =1          | [25] |
| 44. | MJ-6 |  <p> <b>MJ-4:</b> R = <br/> <b>MJ-6:</b> R = <br/> <b>MJ-7:</b> R = <br/> <b>MJ-12:</b> R =  </p> | $C_{47}H_{64}N_7O_4RuS_4$  | 608 | DMF | 16 | 8  | 6  | 3 | 2 | 3 | 2 | O-H=2<br>TBA <sup>+</sup> =1<br>C-S=2 | [25] |

|     |        |                                                                                  |                           |     |     |    |    |    |   |   |   |   |                                       |      |
|-----|--------|----------------------------------------------------------------------------------|---------------------------|-----|-----|----|----|----|---|---|---|---|---------------------------------------|------|
| 45. | MJ-7   | <p>MJ-4: R =  MJ-6: R =  MJ-7: R = <br/> MJ-10: R =  MJ-11: R =  MJ-12: R = </p> | $C_{47}H_{64}N_7O_4RuS_4$ | 603 | DMF | 16 | 8  | 6  | 3 | 2 | 3 | 2 | O-H=2<br>TBA <sup>+</sup> =1<br>C-S=2 | [25] |
| 46. | MJ-10  | <p>MJ-4: R =  MJ-6: R =  MJ-7: R = <br/> MJ-10: R =  MJ-11: R =  MJ-12: R = </p> | $C_{65}H_{92}N_7O_6RuS_4$ | 630 | DMF | 32 | 11 | 6  | 3 | 2 | 3 | 6 | O-H=2<br>TBA <sup>+</sup> =1<br>C-S=2 | [25] |
| 47. | MJ-11  | <p>MJ-4: R =  MJ-6: R =  MJ-7: R = <br/> MJ-10: R =  MJ-11: R =  MJ-12: R = </p> | $C_{65}H_{92}N_7O_6RuS_4$ | 630 | DMF | 32 | 11 | 6  | 3 | 2 | 3 | 6 | O-H=2<br>TBA <sup>+</sup> =1<br>C-S=2 | [25] |
| 48. | MJ-12  | <p>MJ-4: R =  MJ-6: R =  MJ-7: R = <br/> MJ-10: R =  MJ-11: R =  MJ-12: R = </p> | $C_{65}H_{92}N_7O_6RuS_4$ | 631 | DMF | 32 | 11 | 6  | 3 | 2 | 3 | 6 | O-H=2<br>TBA <sup>+</sup> =1<br>C-S=2 | [25] |
| 49. | TFRS-1 | <p><b>TFRS-1: X = C ; R = H</b></p>                                              | $C_{30}H_{18}O_4N_8RuF_6$ | 532 | DMF | 17 | 8  | 12 | 6 | 2 | 0 | 2 | O-H=2<br>C-F=6<br>N-N=2               | [26] |

|     |        |                                                                                                                                                                                                                                                                                                                                                                                                                                                                                                                                                                                                                                                                                                                                                                   |                              |     |     |    |    |    |   |   |   |   |                                  |      |
|-----|--------|-------------------------------------------------------------------------------------------------------------------------------------------------------------------------------------------------------------------------------------------------------------------------------------------------------------------------------------------------------------------------------------------------------------------------------------------------------------------------------------------------------------------------------------------------------------------------------------------------------------------------------------------------------------------------------------------------------------------------------------------------------------------|------------------------------|-----|-----|----|----|----|---|---|---|---|----------------------------------|------|
| 50. | TFRS-2 | 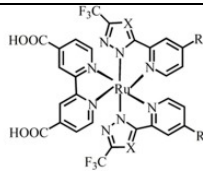 <p> <b>TFRS-1:</b> X = C ; R = H<br/> <b>TFRS-21:</b> X = N ; R = H<br/> <b>TFRS-2:</b> X = C ; R = <br/> <b>TFRS-22:</b> X = N ; R =  </p>                                                                                                                                                                                                                                                                                                                                                                    | $C_{52}H_{52}O_4N_8RuF_6S$   | 533 | DMF | 33 | 14 | 12 | 6 | 2 | 0 | 2 | O-H=2<br>C-F=6<br>C-S=4<br>N-N=2 | [26] |
| 51. | TFRS-3 |  <p> <b>TFRS-1:</b> X = C ; R = H<br/> <b>TFRS-21:</b> X = N ; R = H<br/> <b>TFRS-2:</b> X = C ; R = <br/> <b>TFRS-22:</b> X = N ; R = <br/> <b>TFRS-3:</b> X = C ; R = <br/> <b>TFRS-4:</b> X = C ; R = <br/> <b>TFRS-24:</b> X = N ; R =  </p>            | $C_{60}H_{56}N_8O_4RuF_6S_2$ | 503 | DMF | 37 | 18 | 12 | 6 | 2 | 0 | 2 | O-H=2<br>C-F=6<br>C-S=8<br>N-N=2 | [26] |
| 52. | TFRS-4 |  <p> <b>TFRS-1:</b> X = C ; R = H<br/> <b>TFRS-21:</b> X = N ; R = H<br/> <b>TFRS-2:</b> X = C ; R = <br/> <b>TFRS-22:</b> X = N ; R = <br/> <b>TFRS-3:</b> X = C ; R = <br/> <b>TFRS-4:</b> X = C ; R = <br/> <b>TFRS-24:</b> X = N ; R =  </p> | $C_{50}H_{52}N_8O_4RuF_6S_2$ | 501 | DMF | 31 | 14 | 12 | 6 | 2 | 0 | 2 | O-H=2<br>C-F=6<br>C-S=8<br>N-N=2 | [27] |

|     |         |                                                                                                                                                                                                                                                                                                                                                                                                                                                                                                                                                                                                                                                                                                                                                                |                                                                                   |     |     |    |    |    |   |   |   |   |                                  |      |
|-----|---------|----------------------------------------------------------------------------------------------------------------------------------------------------------------------------------------------------------------------------------------------------------------------------------------------------------------------------------------------------------------------------------------------------------------------------------------------------------------------------------------------------------------------------------------------------------------------------------------------------------------------------------------------------------------------------------------------------------------------------------------------------------------|-----------------------------------------------------------------------------------|-----|-----|----|----|----|---|---|---|---|----------------------------------|------|
| 53. | TFRS-21 | 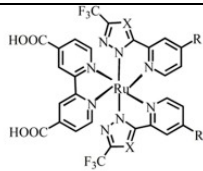 <p> <b>TFRS-1:</b> X = C ; R = H<br/> <b>TFRS-21:</b> X = N ; R = H<br/> <b>TFRS-2:</b> X = C ; R = <br/> <b>TFRS-22:</b> X = N ; R =  </p>                                                                                                                                                                                                                                                                                                                                                                 | C <sub>28</sub> H <sub>16</sub> N <sub>10</sub> O <sub>4</sub> RuF <sub>6</sub>   | 499 | DMF | 15 | 8  | 16 | 6 | 2 | 0 | 2 | O-H=2<br>C-F=6<br>N-N=2          | [27] |
| 54. | TFRS-22 |  <p> <b>TFRS-1:</b> X = C ; R = H<br/> <b>TFRS-21:</b> X = N ; R = H<br/> <b>TFRS-2:</b> X = C ; R = <br/> <b>TFRS-22:</b> X = N ; R =  </p>                                                                                                                                                                                                                                                                                                                                                                | C <sub>50</sub> H <sub>50</sub> N <sub>10</sub> O <sub>4</sub> RuF <sub>6</sub> S | 473 | DMF | 31 | 12 | 16 | 6 | 2 | 0 | 2 | O-H=2<br>C-F=6<br>N-N=2<br>C-S=4 | [27] |
| 55. | TFRS-24 |  <p> <b>TFRS-1:</b> X = C ; R = H<br/> <b>TFRS-21:</b> X = N ; R = H<br/> <b>TFRS-2:</b> X = C ; R = <br/> <b>TFRS-22:</b> X = N ; R = <br/> <b>TFRS-3:</b> X = C ; R = <br/> <b>TFRS-4:</b> X = C ; R = <br/> <b>TFRS-24:</b> X = N ; R =  </p> | C <sub>50</sub> H <sub>50</sub> N <sub>10</sub> O <sub>4</sub> RuF <sub>6</sub>   | 485 | DMF | 29 | 12 | 16 | 6 | 2 | 0 | 2 | O-H=2<br>C-F=6<br>N-N=2<br>C-S=8 | [27] |

|     |         |                                                                                                                                         |                                                                                |     |     |    |    |    |   |   |   |   |       |      |
|-----|---------|-----------------------------------------------------------------------------------------------------------------------------------------|--------------------------------------------------------------------------------|-----|-----|----|----|----|---|---|---|---|-------|------|
| 56. | TFRS-51 | 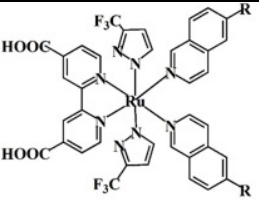 <p>TFRS-51: R = H<br/>TFRS-52: R = <sup>t</sup>Bu</p>  | C <sub>38</sub> H <sub>20</sub> N <sub>8</sub> O <sub>4</sub> RuF <sub>6</sub> | 499 | DMF | 21 | 14 | 12 | 6 | 2 | 0 | 2 | C-F=6 | [28] |
| 57. | TFRS-52 |  <p>TFRS-51: R = H<br/>TFRS-52: R = <sup>t</sup>Bu</p> | C <sub>46</sub> H <sub>36</sub> N <sub>8</sub> O <sub>4</sub> RuF <sub>6</sub> | 495 | DMF | 29 | 14 | 12 | 6 | 2 | 0 | 2 | C-F=6 | [28] |
| 58. | TFRS-53 |  <p>TFRS-53, R= H<br/>TFRS-54, R= t-butyl</p>          | C <sub>38</sub> H <sub>20</sub> N <sub>8</sub> O <sub>4</sub> RuF <sub>6</sub> | 500 | DMF | 23 | 14 | 12 | 6 | 2 | 0 | 2 | C-F=6 | [28] |
| 59. | TFRS-54 |  <p>TFRS-53, R= H<br/>TFRS-54, R= t-butyl</p>        | C <sub>46</sub> H <sub>36</sub> N <sub>8</sub> O <sub>4</sub> RuF <sub>6</sub> | 496 | DMF | 31 | 14 | 12 | 6 | 2 | 0 | 2 | C-F=6 | [28] |

|     |      |                                                                                     |                           |     |     |    |   |    |   |   |   |   |                |      |
|-----|------|-------------------------------------------------------------------------------------|---------------------------|-----|-----|----|---|----|---|---|---|---|----------------|------|
| 60. | CS9  | 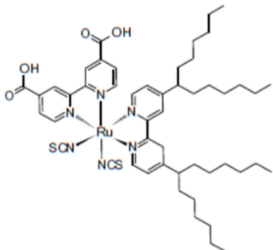    | $C_{50}H_{68}N_6O_4RuS_2$ | 518 | DMF | 38 | 8 | 8  | 4 | 2 | 2 | 2 | O-H=2          | [29] |
| 61. | A597 |    | $C_{41}H_{48}N_8O_4RuS_2$ | 539 | DMF | 27 | 8 | 12 | 4 | 4 | 2 | 2 | O-H=2<br>N-H=2 | [30] |
| 62. | CS27 |   | $C_{42}H_{54}O_4N_6RuS_2$ | 517 | DMF | 28 | 8 | 8  | 4 | 2 | 2 | 2 | O-H=2          | [31] |
| 63. | CS28 |  | $C_{42}H_{50}O_4N_6RuS_2$ | 518 | DMF | 21 | 8 | 8  | 4 | 2 | 2 | 2 | O-H=2          | [31] |



|     |      |                                                                                                                                                                                                                                                                                                                                                                 |                           |     |     |    |   |   |   |   |   |   |       |          |
|-----|------|-----------------------------------------------------------------------------------------------------------------------------------------------------------------------------------------------------------------------------------------------------------------------------------------------------------------------------------------------------------------|---------------------------|-----|-----|----|---|---|---|---|---|---|-------|----------|
| 64. | CS32 | 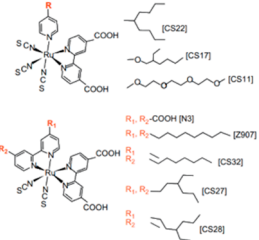 <p>Chemical structure of a ruthenium complex with two terpyridine ligands and two thiolate ligands. The terpyridine ligands have various substituents including carboxylic acid groups and alkyl chains. The thiolate ligands are also substituted with various groups.</p>   | $C_{40}H_{46}O_4N_6RuS_2$ | 518 | DMF | 20 | 8 | 8 | 4 | 2 | 2 | 2 | O-H=2 | [31]     |
| 65. | CS43 |  <p>Chemical structure of a ruthenium complex with two terpyridine ligands and two thiolate ligands. The terpyridine ligands have various substituents including carboxylic acid groups and alkyl chains. The thiolate ligands are also substituted with various groups.</p>   | $C_{44}H_{41}O_4N_6RuS_2$ | 518 | DMF | 32 | 8 | 8 | 4 | 2 | 2 | 2 | O-H=2 | [31]     |
| 66. | CS17 |  <p>Chemical structure of a ruthenium complex with two terpyridine ligands and two thiolate ligands. The terpyridine ligands have various substituents including carboxylic acid groups and alkyl chains. The thiolate ligands are also substituted with various groups.</p>   | $C_{28}H_{28}O_5N_6RuS_3$ | 530 | DMF | 16 | 6 | 6 | 3 | 2 | 2 | 4 | O-H=2 | [31]     |
| 67. | CS22 |  <p>Chemical structure of a ruthenium complex with two terpyridine ligands and two thiolate ligands. The terpyridine ligands have various substituents including carboxylic acid groups and alkyl chains. The thiolate ligands are also substituted with various groups.</p> | $C_{30}H_{33}O_4N_6RuS_3$ | 533 | DMF | 18 | 6 | 6 | 3 | 2 | 2 | 2 | O-H=2 | [31, 32] |

|     |                   |                                                                                     |                                             |     |         |    |    |   |   |   |   |   |                           |          |
|-----|-------------------|-------------------------------------------------------------------------------------|---------------------------------------------|-----|---------|----|----|---|---|---|---|---|---------------------------|----------|
| 68. | LXJ-1             | 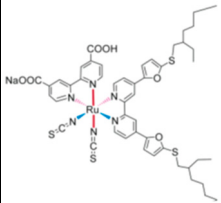    | $C_{48}H_{46}O_6N_6RuS_2Na$                 | 549 | DMF     | 30 | 12 | 8 | 4 | 2 | 2 | 6 | -O-H=1<br>O-Na=1<br>C-S=4 | [33]     |
| 69. | KW-1 <sup>#</sup> |    | $C_{58}H_{36}O_4N_6RuS_8$                   | 515 | DMF     | 32 | 24 | 8 | 4 | 2 | 2 | 2 | O-H=2<br>C-S=12           | [34, 35] |
| 70. | KW-2 <sup>#</sup> |    | $C_{54}H_{40}O_4N_6RuS_2$<br>Benzene Ring-4 | 550 | DMF     | 32 | 22 | 8 | 4 | 2 | 2 | 2 | O-H=2                     | [34, 35] |
| 71. | HRD-1             |   | $C_{56}H_{60}O_4N_6RuS_2$<br>Benzene Ring-2 | 543 | Ethanol | 38 | 16 | 8 | 4 | 2 | 2 | 2 | O-H=2                     | [36]     |
| 72. | K-73              |  | $C_{42}H_{31}O_6N_6RuS_2$<br>Benzene Ring-2 | 545 | DMF     | 22 | 16 | 8 | 4 | 2 | 2 | 6 | O-H=2                     | [14]     |

|     |                   |                                                                                     |                                                                                   |     |     |    |    |    |   |   |   |   |                |          |
|-----|-------------------|-------------------------------------------------------------------------------------|-----------------------------------------------------------------------------------|-----|-----|----|----|----|---|---|---|---|----------------|----------|
| 73. | KC-5 <sup>#</sup> | 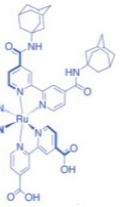    | C <sub>46</sub> H <sub>46</sub> O <sub>6</sub> N <sub>8</sub> RuS <sub>2</sub>    | 537 | DMF | 36 | 8  | 12 | 4 | 4 | 2 | 2 | O-H=2          | [35, 37] |
| 74. | KC-6 <sup>#</sup> |    | C <sub>86</sub> H <sub>122</sub> O <sub>10</sub> N <sub>10</sub> RuS <sub>2</sub> | 531 | DMF | 75 | 10 | 16 | 4 | 6 | 2 | 6 | N-H=4<br>O-H=2 | [35, 37] |
| 75. | KC-7 <sup>#</sup> |    | C <sub>88</sub> H <sub>126</sub> O <sub>10</sub> N <sub>10</sub> RuS <sub>2</sub> | 533 | DMF | 76 | 10 | 16 | 4 | 6 | 2 | 6 | N-H=4<br>O-H=2 | [35, 37] |
| 76. | KC-8 <sup>#</sup> |  | C <sub>48</sub> H <sub>62</sub> O <sub>6</sub> N <sub>6</sub> RuS <sub>2</sub>    | 522 | DMF | 36 | 8  | 8  | 4 | 2 | 2 | 4 | O-H bond<br>4  | [35, 37] |

|     |       |                                                                                     |                              |     |     |    |    |    |   |   |   |   |                |      |
|-----|-------|-------------------------------------------------------------------------------------|------------------------------|-----|-----|----|----|----|---|---|---|---|----------------|------|
| 77. | MH06  | 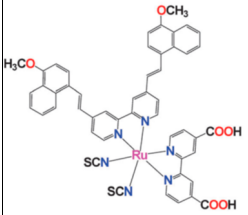    | $C_{50}H_{36}O_6N_6RuS_2$    | 541 | DMF | 28 | 20 | 8  | 4 | 2 | 2 | 4 | 0              | [38] |
| 78. | MH11  |    | $C_{60}H_{36}O_4N_6RuS_2$    | 547 | DMF | 36 | 26 | 8  | 4 | 2 | 2 | 2 | 0              | [38] |
| 79. | MC119 |    | $C_{68}H_{84}N_6O_6RuS_2$    | 548 | DMF | 45 | 16 | 8  | 4 | 2 | 2 | 6 | 0              | [4]  |
| 80. | S3    |  | $C_{81}H_{61}N_{11}O_4RuS_2$ | 516 | DMF | 46 | 32 | 20 | 4 | 2 | 2 | 2 | O-H=1<br>TBA=1 | [39] |

|     |    |                                                                                  |                               |     |     |    |    |    |   |   |   |   |                              |      |
|-----|----|----------------------------------------------------------------------------------|-------------------------------|-----|-----|----|----|----|---|---|---|---|------------------------------|------|
| 81. | S4 |  | $C_{106}H_{61}O_4N_{11}RuS_2$ | 518 | DMF | 49 | 38 | 20 | 4 | 2 | 2 | 2 | O-H=1<br>TBA <sup>+</sup> =1 | [39] |
|-----|----|----------------------------------------------------------------------------------|-------------------------------|-----|-----|----|----|----|---|---|---|---|------------------------------|------|
